# Supplementary material
Source: publisher site journal article supplement (https://www.spandidos-publications.com/5675/downloadSupplementary)
Supplement: Supplementary file 1 [file downloadSupplementary]

Figure S1. Consensus sequence of collagen type VII,  $\alpha 1$  in the present study. The first rows are for the members of the pedigree as indicated in the pedigree chart in Fig. 1A. The COL7A1 exon 87 was amplified, sequenced, and aligned by Bioedit v7.2 software. The color is also defined by Bioedit. \* indicates the position of the variant. HD, healthy donor.

|        |           |   |   |   |   |   |   |   |   |   |   |   |   |   |
|--------|-----------|---|---|---|---|---|---|---|---|---|---|---|---|---|
|        | c.6859G>A |   |   |   |   |   |   |   |   |   |   |   |   |   |
|        | p.G2287R  |   |   |   |   |   |   |   |   |   |   |   |   |   |
|        | *         |   |   |   |   |   |   |   |   |   |   |   |   |   |
| I-1    | C         | T | G | G | C | C | T | G | T | C | R | G | A | C |
| II-2   | C         | T | G | G | C | C | T | G | T | C | R | G | A | C |
| II-5   | C         | T | G | G | C | C | T | G | T | C | R | G | A | C |
| II-7   | C         | T | G | G | C | C | T | G | T | C | R | G | A | C |
| II-11  | C         | T | G | G | C | C | T | G | T | C | R | G | A | C |
| III-4  | C         | T | G | G | C | C | T | G | T | C | R | G | A | C |
| III-6  | C         | T | G | G | C | C | T | G | T | C | R | G | A | C |
| III-7  | C         | T | G | G | C | C | T | G | T | C | G | G | A | C |
| III-9  | C         | T | G | G | C | C | T | G | T | C | R | G | A | C |
| III-16 | C         | T | G | G | C | C | T | G | T | C | G | G | A | C |
| III-17 | C         | T | G | G | C | C | T | G | T | C | G | G | A | C |
| III-18 | C         | T | G | G | C | C | T | G | T | C | G | G | A | C |
| IV-3   | C         | T | G | G | C | C | T | G | T | C | G | G | A | C |
| HD1    | C         | T | G | G | C | C | T | G | T | C | G | G | A | C |
| HD2    | C         | T | G | G | C | C | T | G | T | C | G | G | A | C |
| HD3    | C         | T | G | G | C | C | T | G | T | C | G | G | A | C |
| HD4    | C         | T | G | G | C | C | T | G | T | C | G | G | A | C |
| HD5    | C         | T | G | G | C | C | T | G | T | C | G | G | A | C |
| HD6    | C         | T | G | G | C | C | T | G | T | C | G | G | A | C |
| HD7    | C         | T | G | G | C | C | T | G | T | C | G | G | A | C |
| HD8    | C         | T | G | G | C | C | T | G | T | C | G | G | A | C |
| HD9    | C         | T | G | G | C | C | T | G | T | C | G | G | A | C |
| HD10   | C         | T | G | G | C | C | T | G | T | C | G | G | A | C |
| HD11   | C         | T | G | G | C | C | T | G | T | C | G | G | A | C |
| HD12   | C         | T | G | G | C | C | T | G | T | C | G | G | A | C |
| HD13   | C         | T | G | G | C | C | T | G | T | C | G | G | A | C |
| HD14   | C         | T | G | G | C | C | T | G | T | C | G | G | A | C |
| HD15   | C         | T | G | G | C | C | T | G | T | C | G | G | A | C |
| HD16   | C         | T | G | G | C | C | T | G | T | C | G | G | A | C |
| HD17   | C         | T | G | G | C | C | T | G | T | C | G | G | A | C |
| HD18   | C         | T | G | G | C | C | T | G | T | C | G | G | A | C |
| HD19   | C         | T | G | G | C | C | T | G | T | C | G | G | A | C |
| HD20   | C         | T | G | G | C | C | T | G | T | C | G | G | A | C |
| HD21   | C         | T | G | G | C | C | T | G | T | C | G | G | A | C |
| HD22   | C         | T | G | G | C | C | T | G | T | C | G | G | A | C |
| HD23   | C         | T | G | G | C | C | T | G | T | C | G | G | A | C |
| HD24   | C         | T | G | G | C | C | T | G | T | C | G | G | A | C |
| HD25   | C         | T | G | G | C | C | T | G | T | C | G | G | A | C |
| HD26   | C         | T | G | G | C | C | T | G | T | C | G | G | A | C |
| HD27   | C         | T | G | G | C | C | T | G | T | C | G | G | A | C |
| HD28   | C         | T | G | G | C | C | T | G | T | C | G | G | A | C |
| HD29   | C         | T | G | G | C | C | T | G | T | C | G | G | A | C |
| HD30   | C         | T | G | G | C | C | T | G | T | C | G | G | A | C |
| HD31   | C         | T | G | G | C | C | T | G | T | C | G | G | A | C |
| HD32   | C         | T | G | G | C | C | T | G | T | C | G | G | A | C |
| HD33   | C         | T | G | G | C | C | T | G | T | C | G | G | A | C |
| HD34   | C         | T | G | G | C | C | T | G | T | C | G | G | A | C |
| HD35   | C         | T | G | G | C | C | T | G | T | C | G | G | A | C |
| HD36   | C         | T | G | G | C | C | T | G | T | C | G | G | A | C |
| HD37   | C         | T | G | G | C | C | T | G | T | C | G | G | A | C |
| HD38   | C         | T | G | G | C | C | T | G | T | C | G | G | A | C |
| HD39   | C         | T | G | G | C | C | T | G | T | C | G | G | A | C |
| HD40   | C         | T | G | G | C | C | T | G | T | C | G | G | A | C |
| HD41   | C         | T | G | G | C | C | T | G | T | C | G | G | A | C |
| HD42   | C         | T | G | G | C | C | T | G | T | C | G | G | A | C |
| HD43   | C         | T | G | G | C | C | T | G | T | C | G | G | A | C |
| HD44   | C         | T | G | G | C | C | T | G | T | C | G | G | A | C |
| HD45   | C         | T | G | G | C | C | T | G | T | C | G | G | A | C |
| HD46   | C         | T | G | G | C | C | T | G | T | C | G | G | A | C |
| HD47   | C         | T | G | G | C | C | T | G | T | C | G | G | A | C |
| HD48   | C         | T | G | G | C | C | T | G | T | C | G | G | A | C |
| HD49   | C         | T | G | G | C | C | T | G | T | C | G | G | A | C |
| HD50   | C         | T | G | G | C | C | T | G | T | C | G | G | A | C |
